# Supplementary material
Source: bioRxiv or medRxiv preprint supplement (https://medrxiv.org/highwire/filestream/75917/field_highwire_adjunct_files/0/2020.04.08.20057604-1.pdf)
Supplement: Supplementary file [file 2020.04.08.20057604-1.pdf]

## Supporting Information

### **Same-Day Simultaneous Diagnosis of Bacterial and Fungal Infections in Clinical Practice by Nanopore Targeted Sequencing**

Ming Wang,<sup>1#</sup> Aisi Fu,<sup>2#</sup> Ben Hu,<sup>2</sup> Gaigai Shen,<sup>2</sup> Ran Liu,<sup>2</sup> Wanxu Zhao,<sup>2</sup> Shupeng Jiang,<sup>1</sup> Xuan Cai,<sup>1</sup> Congrong Li,<sup>1</sup> Juan Li,<sup>1</sup> Qing Wu,<sup>1</sup> Kai Feng,<sup>1</sup> Jiashuang Gu,<sup>3</sup> Jia Chen,<sup>2</sup> Mingyue Shu,<sup>2</sup> Binghong Zhang,<sup>4</sup> Zixin Deng,<sup>2,5,6</sup> Lilei Yu,<sup>7</sup> Yan Li,<sup>\*</sup> Tiangang Liu,<sup>2,6\*</sup>

<sup>1</sup> Department of Clinical Laboratory, Renmin Hospital of Wuhan University, Wuhan, 430060, China

<sup>2</sup> Key Laboratory of Combinatorial Biosynthesis and Drug Discovery, Ministry of Education and Wuhan University School of Pharmaceutical Sciences, Wuhan 430071, China

<sup>3</sup> Wuhan Dgensee Clinical Laboratory Co., Ltd. Wuhan 430075, China

<sup>4</sup> Department of Pediatrics, Renmin Hospital of Wuhan University, Wuhan, 430060, China

<sup>5</sup> State Key Laboratory of Microbial Metabolism, Joint International Research Laboratory of Metabolic & Developmental Sciences, and School of Life Sciences and Biotechnology, Shanghai Jiao Tong University, Shanghai, 200030, China

<sup>6</sup> Hubei Engineering Laboratory for Synthetic Microbiology, Wuhan Institute of

Biotechnology, Wuhan, 430075, China

<sup>7</sup> Department of Internal Medicine, Renmin Hospital of Wuhan University, Wuhan, 430060, China

# These authors contributed equally to this work.

**Corresponding author:**

**Prof. Tiangang Liu.** Key Laboratory of Combinatorial Biosynthesis and Drug Discovery, Ministry of Education and Wuhan University School of Pharmaceutical Sciences, Wuhan 430071, China. Email: liutg@whu.edu.cn. Tel: +86-27-68755086

**Prof. Yan Li.** Department of Clinical Laboratory, Renmin Hospital of Wuhan University, Wuhan, 430060, China Email: yanlitf1120@163.com. Tel: +86-27-88071553

## Supporting Methods

### NTS PRIMER DESIGN

All available and complete gene sequences of the 16S rRNA gene, ITS1/2, and *rpoB* of *Mycobacterium* spp. in GenBank (accessed January 2019) were downloaded, and artificial sequences (*e.g.*, lab-derived, synthetic) along with sequence duplicates in reference sequences for each marker were manually removed. Then,  $\leq 10$  reference sequences in each species were randomly retained into collections, resulting in 3 databases for the 16s rRNA gene, ITS1/2 and *rpoB*, respectively. Multiple sequence alignment was performed using Clustal W (version 1.83) for each database individually and the variation rate of each base in the marker gene was used to calculate the conservative region and calculate the degeneracy of each base in full-length primer using an in-house pipeline. 27F/1492R (1) and ITS1/TIS4 (2) primers was selected as a “start primer” of the 16s rRNA gene and ITS1/2 for the following design, respectively. A serial of candidate primers in the conservative region around 50 base pairs of the start primer was calculated. Several “additional primers” for the marker gene were manually selected using the following metrics: 1) primer length: 18-30 bp; 2) melting temperature ( $T_m$ ): 58-65°C, with a temperature difference of less than 3°C between start and additional primer; 4) GC content of primers: 40-60%; 5)  $\Delta G$  (Gibbs free energy) of the last five residues of the primers at the 3' end:  $\geq -9$  kcal/mol. The 27F/1492R or ITS1/4 primer and corresponding additional primers were mixed with the molar ratio of 3:1 to generate the final universal primer pairs. For *Mycobacterial rpoB*, an additional primer was designed as described above based on the previous MF/MR primer (3). The MF/MR primer and additional primers were mixed with the molar ratio of 3:1 to generate the final specific primer pairs.

To sequence different samples on a chip, all universal and specific primers were barcoded by adding 96 different barcode sequences to the 5' end. The barcode sequences were from the Nanopore PCR barcode kit EXP-PBC096 (Oxford Nanopore Technologies) and all primer oligos were synthesized by Genscript. All primers used in this study are listed in [Table S1](#).

## SAMPLE PROCESSING AND DNA EXTRACTION

All clinical specimens were sent to a clinical laboratory, and DNA was extracted within 6 h. Specific pretreatment procedures were performed. In brief, liquid specimens, such as cerebrospinal fluid (CSF) were centrifuged at  $20,000 \times g$  for 10 minutes. The supernatant was removed and 200  $\mu\text{L}$  of the specimen was retained for DNA extraction. Sputum samples were pre-treated with 4 M NaOH as described previously (4). Swabs were vortexed in 1 mL of sterile saline and centrifuged at  $20,000 \times g$  for 10 minutes. The supernatant was removed and 200  $\mu\text{L}$  of saline was added for DNA extraction. Tissue samples were cut into small pieces using sterile scissors and homogenized. DNA was extracted from 200  $\mu\text{L}$  of pre-treated samples using the Sansure DNA Extraction Kit (Changsha, China) following the manufacturer's instructions.

## BIOINFORMATICS METHODOLOGY

Basecalling and quality assessment of sequencing data were performed using high accuracy mode in Guppy (v. 3.1.5). Sequencing reads with low quality (Q score < 7) and undesired length (length < 200nt or length >2000nt) were discarded. Porechop (v. 0.2.4) was used for adaptor trimming and barcode demultiplexing for retained reads. Reads of each sample were mapping against 16S rDNA/ITS reference database collected from NCBI FTP (<ftp://ftp.ncbi.nlm.nih.gov/refseq/TargetedLoci>) using

BLAST, and the taxonomy of each read was assigned according to the taxonomic information of mapped subject sequence. For the reads preliminarily assigned to the same species, a consensus sequence was generated using Medaka (v. 0.10.1). And then the consensus sequence was remapped to the 16S rDNA/ITS reference database, the assigned taxonomy (species level) was using as the final detection results of reads from the same genus of preliminary taxonomy assignment.(1)

Given the anticipated wide array of bacteria and the paucity of knowledge regarding the significance of low-level fungi, we aimed to maximize specificity for bacterial pathogens and to maximize sensitivity for fungal pathogens. The positive bacteria or fungi were determined if it met any of the following thresholds:

Bacteria out of critical list: mapped reads of microbes (species level) in sample >100 or mapped reads of microbes (species level) in sample is greater than that of any other microbes, and the ratio of mapped reads in sample and negative control >10. Fungi out of critical list: >20 reads at the species level or the relative abundance is higher than 50%. the ratio of mapped reads in sample and negative control > 10. Pathogen in critical list: >2 read mapped to pathogens at species level in critical list, such as MTB, *Nocardia*. spp. (5)

The bacteria/fungi in the Critical list are microorganisms that have been clinically known to be pathogenic. Microbes were described as potentially pathogenic or typically nonpathogenic have been investigated from the priori literature and clinical guidelines review, such as National Clinical Laboratory Procedures (Fourth Edition) and the Manual of Clinical Microbiology (Eleventh Edition). Unexplained bacteria: There are currently no microorganisms clearly defined in the guidelines, and the pathogenic potential and epidemiological relevance of such bacteria remains to be defined.

## DETERMINATION OF PATHOGENS

Final reports were discussed with the clinical microbiology specialist with clinicians responsible for each case on an individual basis. The interpretation of culture or sequencing result is according to the type of specimens. In brief, for specimens from sterile setting, any clone found on the plate was defined as positive result and report to the clinicians after eliminating the possibility of contamination. For specimens from non-sterile setting, type and quantity of strains were both considered for judgement of positive result. Take BAL as an example. if the microbes grew  $>10^4$  CFU per mL or grew  $<10^4$  CFU/mL but were identified as a single gram-negative bacillus that was the only reportable pathogen. The following organisms, when identified, were reported as oral flora: coagulase-negative *Staphylococcus* spp., alpha-hemolytic *Streptococcus* spp., gamma-hemolytic *Streptococcus* spp., *Micrococcus* spp., *Enterococcus* spp., *Corynebacterium* spp., *Lactobacillus* spp., *Bacillus* spp. (other than *B. anthracis*), *Neisseria* spp., *Haemophilus* spp. (other than *Haemophilus influenzae*), *Eikenella* spp., *Capnocytophaga* spp., and yeast (other than *Cryptococcus* spp.).

## **Supporting Results**

### DESIGN OF NTS PRIMERS AND SEQUENCING LIBRARY PREPARATION

For the design of the universal primer, primers 27F/1492R (for bacterial 16s rRNA gene) (1) and ITS1/ITS4 (for fungal ITS1/2) (2) have been confirmed for identification of bacteria and fungi. Besides these two pairs of primers, we designed three “additional primers” (8F, 38F, and 1495R) for amplification of bacterial 16s rRNA gene and two “additional primers” (ITS1-2 and ITS4-2) for amplification of ITS1/2 to reduce the risk of amplification failure induced by the mismatch of primer, by multiple sequence alignment of each database and calculation of the variation rate of each base (Table S1).

For the design of the specific primer, the *rpoB* database of *Mycobacterium* spp. was constructed and analyzed according to the principle of universal primer. Genus-specific primer (MF/MR) targeted *rpoB* was used for the identification of *Mycobacterium* spp. (3). Besides this pair of primers, we added another pair of primers(MF-2/MR-2) that can be targeted to increase sensitivity against *Mycobacterium* spp. and reduce the influence of unavoidable commensal microbiota in clinical samples (Table S1).

Although the nanopore sequencing platform can sequence DNA with different lengths in a single run, the shorter DNA fragments are more prone to be sequenced compared to the longer fragments. Moreover, the universal primer targeted all microbes in samples and required more sequencing data to detect all those microbes, especially for the relatively less abundant microbes, compared to specific marker gene. Therefore, according to our previous experience, in order to balance the data output of each marker, the PCR products of 16s rRNA gene (~ 1.5 kb), ITS1/2 (~ 400 - 800 bp), and *rpoB* (~ 400 bp) were pooled with the mass ratio of 10:3:1. Pooled products from the different samples were then mixed with equal mass and this mixed product was used for library preparation.

**Table S1. Primers used in this study**

| Category         | Marker gene     | Primer name    | Primer sequence (5' to 3')             | Primer source                       |
|------------------|-----------------|----------------|----------------------------------------|-------------------------------------|
| universal primer | 16s rRNA        | 8F             | Barcode sequence-GGATCCAGACTTTGATYMTGG | This study                          |
|                  |                 | 27F            | Barcode sequence-AGRGTTYGATYMTGGCTCAG  | Calus et al.(1)                     |
|                  |                 | 38F            | Barcode sequence-GGCTCAGRWYGAACGCTRG   | This study                          |
|                  |                 | 1492R          | Barcode sequence-RGYTACCTTGTTACGACTT   | Calus et al.(1)                     |
|                  |                 | 1495R          | Barcode sequence-TASRGYTACCTTGTTACGA   | This study                          |
|                  | ITS1/2          | ITS1           | TCCGTAGGTGAACCTGCGG                    | Fujita et al.(2)                    |
|                  |                 | ITS1-2         | GTGAACCTGCGGAAGGATCAT                  | This study                          |
|                  |                 | ITS4           | TCCTCCGCTTATTGATATGC                   | Fujita et al.(2)                    |
|                  |                 | ITS4-2         | TATGCTTAAGTTCAGCGGGT                   | This study                          |
|                  |                 | ITS1-barcode   | Barcode sequence-TCCGTAGGTGAACCTGCGG   | Fujita et al.(2)                    |
|                  |                 | ITS1-2-barcode | Barcode sequence-GTGAACCTGCGGAAGGATCAT | This study                          |
|                  |                 | ITS4-barcode   | Barcode sequence-TCCTCCGCTTATTGATATGC  | Fujita et al.(2)                    |
|                  |                 | ITS4-2-barcode | Barcode sequence-TATGCTTAAGTTCAGCGGGT  | This study                          |
|                  | specific primer | <i>rpoB</i>    | MF                                     | Barcode sequence-CGACCACTTCGGCAACCG |
| MR               |                 |                | Barcode sequence-TCGATCGGGCACATCCGG    | Kim et al.(3)                       |
| MF-2             |                 |                | Barcode sequence-GACGACATCGACCACTTCGG  | This study                          |
| MR-2             |                 |                | Barcode sequence-GGGTCTCGATCGGGCACAT   | This study                          |



**Table S2. classification of microbes**

| <b>Respiratory system-well-recognized pathogens; critical pathogens were marked with *</b> |                                        |                                |
|--------------------------------------------------------------------------------------------|----------------------------------------|--------------------------------|
| <b>Bacteria</b>                                                                            | <b>Fungi</b>                           | <b>Special pathogens</b>       |
| <i>Mycobacterium sp</i>                                                                    | <i>Talaromyces sp</i>                  | <i>Mycoplasma sp</i>           |
| <i>Mycobacterium tuberculosis</i> *                                                        | <i>Talaromyces marneffeii</i> *        | <i>Mycoplasma pneumoniae</i> * |
| <i>Nontuberculous mycobacterium</i> *                                                      | <i>Paracoccidioides sp</i>             | <i>Chlamydia sp</i>            |
| <i>Mycobacterium leprosy</i> *                                                             | <i>Paracoccidioides brasiliensis</i> * | <i>Chlamydia pneumoniae</i> *  |
| <i>Bordetella sp</i>                                                                       | <i>Coccidioide sp</i>                  | <i>Chlamydia trachomatis</i> * |
| <i>Bordetella pertussis</i>                                                                | <i>Coccidioides immitis</i> *          | <i>Chlamydia psittaci</i> *    |
| <i>Bordetella bronchiseptica</i>                                                           | <i>Sporotrichum sp</i>                 | <i>Borrelia sp</i>             |
| <i>Francis sp</i>                                                                          | <i>Sporotrichum schenckii</i> *        | <i>Borrelia vincenti</i> *     |
| <i>Francisella tularensis</i> *                                                            | <i>Histoplasma sp</i>                  | <i>Ureaplasma sp</i>           |
| <i>Listeria sp</i>                                                                         | <i>Histoplasma capsulatum</i> *        | <i>Ureaplasma urealyticum</i>  |
| <i>Listeria monocytogenes</i>                                                              | <i>Blastomyces sp</i>                  | <i>Ureaplasma parvum</i>       |
| <i>Yersinia sp</i>                                                                         | <i>Blastomyces dermatitidis</i> *      |                                |
| <i>Yersinia pestis</i> *                                                                   | <i>Pneumocystis</i>                    |                                |
| <i>Legionella sp</i>                                                                       | <i>Pneumocystis jiroveci</i> *         |                                |
| <i>Legionella pneumophila</i> *                                                            |                                        |                                |
| <b>Respiratory system-opportunistic pathogens</b>                                          |                                        |                                |
| <b>Bacteria</b>                                                                            | <b>Fungi</b>                           |                                |
| <i>Staphylococcus sp</i>                                                                   | <i>Candida sp</i>                      |                                |
| <i>Staphylococcus aureus</i>                                                               | <i>Candida albicans</i>                | <i>Staphylococcus</i>          |
| <i>Staphylococcus saprophyticus</i>                                                        | <i>Candida parapsilosis</i>            |                                |
| <i>Streptococcus sp</i>                                                                    | <i>Candida glabrata</i>                |                                |
| <i>Streptococcus pyogenes</i>                                                              | <i>Candida tropicalis</i>              |                                |
| <i>Streptococcus pneumoniae</i>                                                            | <i>Candida krusei</i>                  |                                |
| <i>Streptococcus agalactiae</i>                                                            | <i>Cryptococcus sp</i>                 |                                |
| <i>Neisseria sp</i>                                                                        | <i>Cryptococcus neoformans</i>         |                                |
| <i>Neisseria meningitidis</i>                                                              | <i>Cryptococcus gattii</i>             |                                |
| <i>Nocardia sp</i>                                                                         | <i>Aspergillus sp</i>                  |                                |
| <i>Nocardia asteroides</i>                                                                 | <i>Aspergillus fumigatus</i>           |                                |
| <i>Nocardia brasiliensis</i>                                                               | <i>Aspergillus niger</i>               |                                |
| <i>Rhodococcus sp</i>                                                                      | <i>Aspergillus terreus</i>             |                                |
| <i>Rhodococcus equi</i>                                                                    | <i>Aspergillus flavus</i>              |                                |
| <i>Moraxella sp</i>                                                                        | <i>Aspergillus versicolor</i>          |                                |
| <i>Moraxella catarrhalis</i>                                                               | <i>Fusarium sp</i>                     |                                |
| <i>Escherichia sp</i>                                                                      | <i>Fusarium solani</i>                 |                                |
| <i>Escherichia coli</i>                                                                    | <i>Fusarium oxysporum</i>              |                                |
| <i>Escherichia fergusonii</i>                                                              | <i>Fusarium moniliforme</i>            |                                |
| <i>Pseudomonas sp</i>                                                                      | <i>Alternaria sp</i>                   |                                |
| <i>Pseudomonas aeruginosa</i>                                                              | <i>Alternaria infectoria</i>           |                                |
| <i>Pseudomonas putida</i>                                                                  | <i>Alternaria alternata</i>            |                                |
| <i>Pseudomonas fluorescens</i>                                                             | <i>Scedosporium sp</i>                 |                                |

|                                              |                                      |  |
|----------------------------------------------|--------------------------------------|--|
| <i>Proteus sp</i>                            | <i>Scedosporium prolificans</i>      |  |
| <i>Proteus mirabilis</i>                     | <i>Scedosporium apiospermum</i>      |  |
| <i>Proteus vulgaris</i>                      | <i>Cladosporium sp</i>               |  |
| <i>Acinetobacter sp</i>                      | <i>Cladosporium axysporum</i>        |  |
| <i>Acinetobacter baumannii</i>               | <i>Cladosporium cladosporioides</i>  |  |
| <i>Acinetobacter lwoffii</i>                 | <i>Curvularia sp</i>                 |  |
| <i>Acinetobacter junii</i>                   | <i>Curvularia lunata</i>             |  |
| <i>Acinetobacter johnsonii</i>               | <i>Rhizopus sp</i>                   |  |
| <i>Klebsiella sp</i>                         | <i>Rhizopus arrhizus</i>             |  |
| <i>Klebsiella pneumoniae</i>                 | <i>Mucor sp</i>                      |  |
| <i>Klebsiella oxytoca</i>                    | <i>Mucor circinelloides</i>          |  |
| <i>Klebsiella aerogenes</i>                  | <i>Cladophialophora sp</i>           |  |
| <i>Enterobacter sp</i>                       | <i>Cladophialophora bantiana</i>     |  |
| <i>Enterobacter cloacae</i>                  | <i>Cladophialophora carrionii</i>    |  |
| <i>Serratia sp</i>                           |                                      |  |
| <i>Serratia marcescens</i>                   |                                      |  |
| <i>Serratia liquefaciens</i>                 |                                      |  |
| <i>Morganella sp</i>                         |                                      |  |
| <i>Morganella morganii</i>                   |                                      |  |
| <i>Stenotrophomonas sp</i>                   |                                      |  |
| <i>Stenotrophomonas maltophilia</i>          |                                      |  |
| <i>Burkholderia sp</i>                       |                                      |  |
| <i>Burkholderia cepacia</i>                  |                                      |  |
| <i>Burkholderia lata</i>                     |                                      |  |
| <i>Haemophilus sp</i>                        |                                      |  |
| <i>Haemophilus haemolyticus</i>              |                                      |  |
| <i>Haemophilus influenzae</i>                |                                      |  |
|                                              |                                      |  |
| <b>Respiratory System-commensal bacteria</b> |                                      |  |
| <b>Bacteria</b>                              | <b>Anaerobe</b>                      |  |
| <i>Actinobacillus sp</i>                     | <i>Anaerococcus sp</i>               |  |
| <i>Actinobacillus rossii</i>                 | <i>Anaerococcus hydrogenalis</i>     |  |
| <i>Coagulase negative staphylococci</i>      | <i>Peptostreptococcus sp</i>         |  |
| <i>Staphylococcus haemolyticus</i>           | <i>Peptostreptococcus anaerobius</i> |  |
| <i>Staphylococcus hominis</i>                | <i>Bacteroides sp</i>                |  |
| <i>Corynebacterium sp</i>                    | <i>Bacteroides fragilis</i>          |  |
| <i>Corynebacterium striatum</i>              | <i>Prevotella sp</i>                 |  |
| <i>Bacillus sp</i>                           | <i>Prevotella melaninogenica</i>     |  |
| <i>Bacillus cereus</i>                       | <i>Finegoldia sp</i>                 |  |
| <i>Streptococcus sp</i>                      | <i>Finegoldia magna</i>              |  |
| <i>Streptococcus mitis</i>                   | <i>Veillonella sp</i>                |  |
| <i>Neisseria sp</i>                          | <i>Veillonella parvula</i>           |  |
| <i>Neisseria flavescens</i>                  | <i>Rothia sp</i>                     |  |

|                                   |                            |  |
|-----------------------------------|----------------------------|--|
| <i>Granulicatella sp</i>          | <i>Rothia mucilaginosa</i> |  |
| <i>Granulicatella adiacens</i>    |                            |  |
| <i>Abiotrophia sp</i>             |                            |  |
| <i>Abiotrophia defectiva</i>      |                            |  |
| <i>Moraxella sp</i>               |                            |  |
| <i>Moraxella osloensis</i>        |                            |  |
| <i>Haemophilus sp</i>             |                            |  |
| <i>Haemophilus parainfluenzae</i> |                            |  |
| <i>Eikenella sp</i>               |                            |  |
| <i>Eikenella corrodens</i>        |                            |  |
| <i>Enterococcus sp</i>            |                            |  |
| <i>Enterococcus faecalis</i>      |                            |  |
| <i>Enterococcus faecium</i>       |                            |  |
| <i>Capnocytophaga sp</i>          |                            |  |
| <i>Capnocytophaga gingivalis</i>  |                            |  |

| <b>urinary system well-recognized pathogens;<br/>critical pathogens were marked with *</b> |                                        |                                |
|--------------------------------------------------------------------------------------------|----------------------------------------|--------------------------------|
| <b>Bacteria</b>                                                                            | <b>Fungi</b>                           | <b>Special pathogens</b>       |
| <i>Brucella sp</i>                                                                         | <i>Talaromyces sp</i>                  | <i>Chlamydia sp</i>            |
| <i>Brucella suis</i> *                                                                     | <i>Talaromyces marneffeii</i> *        | <i>Chlamydia trachomatis</i> * |
| <i>Haemophilus sp</i>                                                                      | <i>Paracoccidioides sp</i>             | <i>Treponema sp</i>            |
| <i>Haemophilus ducreyi</i>                                                                 | <i>Paracoccidioides brasiliensis</i> * | <i>Treponema pallidum</i> *    |
| <i>Calymmatobacterium sp</i>                                                               | <i>Coccidioides sp</i>                 |                                |
| <i>Calymmatobacterium granulomatis</i>                                                     | <i>Coccidioides immitis</i> *          |                                |
| <i>Neisseria sp</i>                                                                        | <i>Sporotrichum sp</i>                 |                                |
| <i>Neisseria gonorrhoeae</i> *                                                             | <i>Sporotrichum schenckii</i> *        |                                |
| <i>Legionella sp</i>                                                                       | <i>Histoplasma sp</i>                  |                                |
| <i>Legionella pneumophila</i> *                                                            | <i>Histoplasma capsulatum</i> *        |                                |
| <i>Mycobacterium sp</i>                                                                    | <i>Blastomyces sp</i>                  |                                |
| <i>Mycobacterium tuberculosis</i> *                                                        | <i>Blastomyces dermatitidis</i> *      |                                |
| <i>Nontuberculous mycobacterium</i> *                                                      |                                        |                                |
| <i>Mycobacterium leprosy</i> *                                                             |                                        |                                |
| <i>Burkholderia sp</i>                                                                     |                                        |                                |
| <i>Burkholderia pseudomallei</i> *                                                         |                                        |                                |
| <i>Listeria sp</i>                                                                         |                                        |                                |
| <i>Listeria monocytogenes</i>                                                              |                                        |                                |
| <i>Salmonella sp</i>                                                                       |                                        |                                |
| <i>Shigella sp</i> *                                                                       |                                        |                                |
|                                                                                            |                                        |                                |
| <b>urinary-system opportunistic pathogens</b>                                              |                                        |                                |
| <b>Bacteria</b>                                                                            | <b>Fungi</b>                           | <b>Special pathogens</b>       |

|                                     |                                |                               |
|-------------------------------------|--------------------------------|-------------------------------|
| <i>Staphylococcus sp</i>            | <i>Candida sp</i>              | <i>Mycoplasma sp</i>          |
| <i>Staphylococcus aureus</i>        | <i>Candida albicans</i>        | <i>Mycoplasma genitalium</i>  |
| <i>Staphylococcus saprophyticus</i> | <i>Candida parapsilosis</i>    | <i>Mycoplasma hominis</i>     |
| <i>Streptococcus sp</i>             | <i>Candida glabrata</i>        | <i>Ureaplasma sp</i>          |
| <i>Streptococcus pyogenes</i>       | <i>Candida tropicalis</i>      | <i>Ureaplasma urealyticum</i> |
| <i>Streptococcus pneumoniae</i>     | <i>Candida krusei</i>          | <i>Ureaplasma parvum</i>      |
| <i>Streptococcus agalactiae</i>     | <i>Cryptococcus sp</i>         |                               |
| <i>Enterococcus sp</i>              | <i>Cryptococcus neoformans</i> |                               |
| <i>Enterococcus faecalis</i>        | <i>Cryptococcus gattii</i>     |                               |
| <i>Enterococcus faecium</i>         | <i>Trichosporon sp</i>         |                               |
| <i>Corynebacterium sp</i>           | <i>Trichosporon asahii</i>     |                               |
| <i>Corynebacterium jeikeium</i>     | <i>Aspergillus sp</i>          |                               |
| <i>Corynebacterium urealyticum</i>  | <i>Aspergillus fumigatus</i>   |                               |
| <i>Campylobacter sp</i>             | <i>Aspergillus niger</i>       |                               |
| <i>Campylobacter ureolyticus</i>    | <i>Aspergillus terreus</i>     |                               |
| <i>Nocardia sp</i>                  | <i>Aspergillus flavus</i>      |                               |
| <i>Nocardia asteroides</i>          | <i>Aspergillus versicolor</i>  |                               |
| <i>Nocardia brasiliensis</i>        |                                |                               |
| <i>Escherichia sp</i>               |                                |                               |
| <i>Escherichia coli</i>             |                                |                               |
| <i>Escherichia fergusonii</i>       |                                |                               |
| <i>Pseudomonas sp</i>               |                                |                               |
| <i>Pseudomonas aeruginosa</i>       |                                |                               |
| <i>Pseudomonas putida</i>           |                                |                               |
| <i>Pseudomonas fluorescens</i>      |                                |                               |
| <i>Proteus sp</i>                   |                                |                               |
| <i>Proteus mirabilis</i>            |                                |                               |
| <i>Proteus vulgaris</i>             |                                |                               |
| <i>Acinetobacter sp</i>             |                                |                               |
| <i>Acinetobacter baumannii</i>      |                                |                               |
| <i>Acinetobacter lwoffii</i>        |                                |                               |
| <i>Acinetobacter junii</i>          |                                |                               |
| <i>Acinetobacter johnsonii</i>      |                                |                               |
| <i>Klebsiella sp</i>                |                                |                               |
| <i>Klebsiella pneumoniae</i>        |                                |                               |
| <i>Klebsiella oxytoca</i>           |                                |                               |
| <i>Klebsiella aerogenes</i>         |                                |                               |
| <i>Enterobacter sp</i>              |                                |                               |
| <i>Enterobacter cloacae</i>         |                                |                               |
| <i>Serratia sp</i>                  |                                |                               |
| <i>Serratia marcescens</i>          |                                |                               |
| <i>Serratia liquefaciens</i>        |                                |                               |
| <i>Moraxella sp</i>                 |                                |                               |

|                                                                                                                                                                                                                                                                                                                                                                              |                                      |  |
|------------------------------------------------------------------------------------------------------------------------------------------------------------------------------------------------------------------------------------------------------------------------------------------------------------------------------------------------------------------------------|--------------------------------------|--|
| <i>Moraxella catarrhalis</i>                                                                                                                                                                                                                                                                                                                                                 |                                      |  |
| <i>Morganella sp</i>                                                                                                                                                                                                                                                                                                                                                         |                                      |  |
| <i>Morganella morganii</i>                                                                                                                                                                                                                                                                                                                                                   |                                      |  |
| <i>Stenotrophomonas sp</i>                                                                                                                                                                                                                                                                                                                                                   |                                      |  |
| <i>Stenotrophomonas maltophilia</i>                                                                                                                                                                                                                                                                                                                                          |                                      |  |
| <i>Burkholderia sp</i>                                                                                                                                                                                                                                                                                                                                                       |                                      |  |
| <i>Burkholderia cepacia</i>                                                                                                                                                                                                                                                                                                                                                  |                                      |  |
| <i>Burkholderia lata</i>                                                                                                                                                                                                                                                                                                                                                     |                                      |  |
| <i>Haemophilus sp</i>                                                                                                                                                                                                                                                                                                                                                        |                                      |  |
| <i>Haemophilus haemolyticus</i>                                                                                                                                                                                                                                                                                                                                              |                                      |  |
| <i>Haemophilus influenzae</i>                                                                                                                                                                                                                                                                                                                                                |                                      |  |
| <i>Clostridium sp</i>                                                                                                                                                                                                                                                                                                                                                        |                                      |  |
| <i>Clostridium perfringens</i>                                                                                                                                                                                                                                                                                                                                               |                                      |  |
| <i>Gardnerella sp</i>                                                                                                                                                                                                                                                                                                                                                        |                                      |  |
| <i>Gardnerella vaginalis</i>                                                                                                                                                                                                                                                                                                                                                 |                                      |  |
| <i>Atopobium sp</i>                                                                                                                                                                                                                                                                                                                                                          |                                      |  |
| <i>Atopobium vaginae</i>                                                                                                                                                                                                                                                                                                                                                     |                                      |  |
| <i>Actinomyces sp</i>                                                                                                                                                                                                                                                                                                                                                        |                                      |  |
| <i>Actinomyces israelii</i>                                                                                                                                                                                                                                                                                                                                                  |                                      |  |
|                                                                                                                                                                                                                                                                                                                                                                              |                                      |  |
| <b>Urinary-System commensal bacteria</b>                                                                                                                                                                                                                                                                                                                                     |                                      |  |
| <b>Bacteria</b>                                                                                                                                                                                                                                                                                                                                                              | <b>Anaerobe</b>                      |  |
| <i>Actinobacillus sp</i>                                                                                                                                                                                                                                                                                                                                                     | <i>Lactobacillus sp</i>              |  |
| <i>Actinobacillus rossii</i>                                                                                                                                                                                                                                                                                                                                                 | <i>Lactobacillus iners</i>           |  |
| <i>Coagulase negative staphylococci</i>                                                                                                                                                                                                                                                                                                                                      | <i>Bifidobacterium sp</i>            |  |
| <i>Staphylococcus haemolyticus</i>                                                                                                                                                                                                                                                                                                                                           | <i>Bifidobacterium longum</i>        |  |
| <i>Staphylococcus hominis</i>                                                                                                                                                                                                                                                                                                                                                | <i>Anaerococcus sp</i>               |  |
| <i>Corynebacterium sp</i>                                                                                                                                                                                                                                                                                                                                                    | <i>Anaerococcus hydrogenalis</i>     |  |
| <i>Corynebacterium striatum</i>                                                                                                                                                                                                                                                                                                                                              | <i>Peptostreptococcus sp</i>         |  |
| <i>Bacillus sp</i>                                                                                                                                                                                                                                                                                                                                                           | <i>Peptostreptococcus anaerobius</i> |  |
| <i>Bacillus cereus</i>                                                                                                                                                                                                                                                                                                                                                       | <i>Bacteroides sp</i>                |  |
| <i>Streptococcus sp</i>                                                                                                                                                                                                                                                                                                                                                      | <i>Bacteroides fragilis</i>          |  |
| <i>Streptococcus mitis</i>                                                                                                                                                                                                                                                                                                                                                   | <i>Prevotella sp</i>                 |  |
| <i>Neisseria sp</i>                                                                                                                                                                                                                                                                                                                                                          | <i>Prevotella melaninogenica</i>     |  |
| <i>Neisseria flavescens</i>                                                                                                                                                                                                                                                                                                                                                  | <i>Finegoldia sp</i>                 |  |
|                                                                                                                                                                                                                                                                                                                                                                              | <i>Finegoldia magna</i>              |  |
|                                                                                                                                                                                                                                                                                                                                                                              | <i>Veillonella sp</i>                |  |
|                                                                                                                                                                                                                                                                                                                                                                              | <i>Veillonella parvula</i>           |  |
| <p>Note 1: the above list is only the common pathogens/commensal bacteria related to this site, and does not represent the whole detection scope of this test item. There are many pathogenic bacteria species in the genus of some bacteria, and only some bacteria species with the highest clinical isolation frequency are listed, such as <i>Acinetobacter</i> spp.</p> |                                      |  |

Note 2: "conditional pathogenic bacteria", "commensal bacteria colonize" is based on "National clinical laboratory operation rules" (fourth edition), "Manual of clinical microbiology" (11), "The clinical application of antibacterial drugs instruction manual "(2016 edition), "The bacterial and fungal smear microscopy and training results report specification expert consensus" (2017 edition) guidelines.

**Table S3. Construction of Mock community**

| <b>Strains in mock community</b> | <b>Density 1<br/>(CFU/mL)</b> | <b>Density 2<br/>(CFU/mL)</b> | <b>Density 3<br/>(CFU/mL)</b> | <b>Proportion in<br/>community</b> |
|----------------------------------|-------------------------------|-------------------------------|-------------------------------|------------------------------------|
| <i>Moraxella catarrhalis</i>     | 25                            | 50                            | 100                           | 5%                                 |
| <i>Acinetobacter baumannii</i>   | 75                            | 150                           | 300                           | 15%                                |
| <i>Staphylococcus aureus</i>     | 150                           | 300                           | 600                           | 30%                                |
| <i>Candida glabrata</i>          | 25                            | 50                            | 100                           | 5%                                 |
| <i>Candida parapsilosis</i>      | 75                            | 150                           | 300                           | 15%                                |
| <i>Candida tropicalis</i>        | 150                           | 300                           | 600                           | 30%                                |
| total                            | 500                           | 1000                          | 2000                          |                                    |

**Table S4. standard strains tested by NTS individually**

| <b>Species</b>                              | <b>Identification capacity</b>        |
|---------------------------------------------|---------------------------------------|
| <i>Enterococcus hirae</i>                   | Identified correctly at genus level   |
| <i>Acinetobacter pittii</i>                 | Identified correctly at genus level   |
| <i>Achromobacter xylosoxidans</i>           | Identified correctly at genus level   |
| <i>Citrobacter freundii</i>                 | Identified correctly at genus level   |
| <i>Veillonella parvula</i>                  | Identified correctly at species level |
| <i>Streptococcus salivarius</i>             | Identified correctly at species level |
| <i>Streptococcus pyogenes</i>               | Identified correctly at species level |
| <i>Streptococcus pneumoniae</i>             | Identified correctly at species level |
| <i>Streptococcus constellatus</i>           | Identified correctly at species level |
| <i>Streptococcus agalactiae</i>             | Identified correctly at species level |
| <i>Stenotrophomonas maltophilia</i>         | Identified correctly at species level |
| <i>Staphylococcus epidermidis</i>           | Identified correctly at species level |
| <i>Staphylococcus capitis</i>               | Identified correctly at species level |
| <i>Staphylococcus aureus</i>                | Identified correctly at species level |
| <i>Salmonella enterica</i>                  | Identified correctly at species level |
| <i>Pseudomonas stutzeri</i>                 | Identified correctly at species level |
| <i>Pseudomonas aeruginosa</i>               | Identified correctly at species level |
| <i>Neisseria gonorrhoeae</i>                | Identified correctly at species level |
| <i>Mycobacterium smegmatis</i>              | Identified correctly at species level |
| <i>Mycobacterium abscessus</i>              | Identified correctly at species level |
| <i>Moraxella nonliquefaciens</i>            | Identified correctly at species level |
| <i>Moraxella catarrhalis</i>                | Identified correctly at species level |
| <i>Haemophilus influenzae</i>               | Identified correctly at species level |
| <i>Gardnerella vaginalis</i>                | Identified correctly at species level |
| <i>Finegoldia magna</i>                     | Identified correctly at species level |
| <i>Enterococcus faecium</i>                 | Identified correctly at species level |
| <i>Enterococcus faecalis</i>                | Identified correctly at species level |
| <i>Enterococcus avium</i>                   | Identified correctly at species level |
| <i>Corynebacterium urealyticum</i>          | Identified correctly at species level |
| <i>Corynebacterium pseudodiphtheriticum</i> | Identified correctly at species level |
| <i>Corynebacterium jeikeium</i>             | Identified correctly at species level |
| <i>Bacteroides vulgatus</i>                 | Identified correctly at species level |
| <i>Bacteroides fragilis</i>                 | Identified correctly at species level |
| <i>Aeromonas hydrophila</i>                 | Identified correctly at species level |
| <i>Aeromonas caviae</i>                     | Identified correctly at species level |
| <i>Acinetobacter lwoffii</i>                | Identified correctly at species level |
| <i>Acinetobacter baumannii</i>              | Identified correctly at species level |
| <i>Aspergillus terreus</i>                  | Identified correctly at species level |
| <i>Aspergillus niger</i>                    | Identified correctly at species level |
| <i>Cryptococcus neoformans</i>              | Identified correctly at species level |
| [ <i>Candida</i> ] <i>glabrata</i>          | Identified correctly at species level |
| <i>Candida parapsilosis</i>                 | Identified correctly at species level |



---

|                               |                                       |
|-------------------------------|---------------------------------------|
| <i>Streptococcus oralis</i>   | Identified correctly at species level |
| <i>Proteus vulgaris</i>       | Identified correctly at species level |
| <i>Nocardia farcinica</i>     | Identified correctly at species level |
| <i>Neisseria meningitidis</i> | Identified correctly at species level |
| <i>Candida albicans</i>       | Identified correctly at species level |
| <i>Aspergillus fumigatus</i>  | Identified correctly at species level |
| <i>Klebsiella pneumoniae</i>  | Identified correctly at species level |
| <i>Escherichia coli</i>       | Identified correctly at species level |

---

**Table S5. Sequencing reads of six pathogens in mock community**

|                                                            | <i>Moraxella</i><br><i>catarrhalis</i> | <i>Acinetobacter</i><br><i>baumannii</i> | <i>Staphylococcus</i><br><i>aureus</i> | [ <i>Candida</i> ]<br><i>glabrata</i> | <i>Candida</i><br><i>parapsilosis</i> | <i>Candida</i><br><i>tropicalis</i> |
|------------------------------------------------------------|----------------------------------------|------------------------------------------|----------------------------------------|---------------------------------------|---------------------------------------|-------------------------------------|
| <b>Statistics by reads</b>                                 |                                        |                                          |                                        |                                       |                                       |                                     |
| <b>CFU/mL</b>                                              | 25                                     | 75                                       | 150                                    | 25                                    | 75                                    | 150                                 |
| replicate 1                                                | 406                                    | 284                                      | 182                                    | 24                                    | 603                                   | 145                                 |
| replicate 2                                                | 179                                    | 159                                      | 78                                     | 7915                                  | 1710                                  | 604                                 |
| replicate 3                                                | 304                                    | 239                                      | 111                                    | 16577                                 | 2986                                  | 1491                                |
| replicate 4                                                | 1096                                   | 647                                      | 280                                    | 14890                                 | 2876                                  | 582                                 |
| replicate 5                                                | 1090                                   | 762                                      | 291                                    | 13378                                 | 2018                                  | 401                                 |
| replicate 6                                                | 1409                                   | 1003                                     | 459                                    | 16377                                 | 4035                                  | 2190                                |
| replicate 7                                                | 913                                    | 814                                      | 390                                    | 16386                                 | 3394                                  | 1070                                |
| replicate 8                                                | 190                                    | 161                                      | 39                                     | 16848                                 | 2266                                  | 930                                 |
| replicate 9                                                | 163                                    | 114                                      | 44                                     | 13527                                 | 2146                                  | 802                                 |
| replicate 10                                               | 731                                    | 573                                      | 371                                    | 12291                                 | 2154                                  | 279                                 |
| replicate 11                                               | 465                                    | 371                                      | 202                                    | 12310                                 | 2329                                  | 474                                 |
| replicate 12                                               | 1249                                   | 1104                                     | 741                                    | 8481                                  | 976                                   | 411                                 |
| <b>Statistics by RPM (Reads per millions mapped reads)</b> |                                        |                                          |                                        |                                       |                                       |                                     |
| <b>CFU/mL</b>                                              | 25                                     | 75                                       | 150                                    | 25                                    | 75                                    | 150                                 |
| replicate 1                                                | 165511.6                               | 115776.6                                 | 74194.9                                | 9783.9                                | 245821.4                              | 59111.3                             |
| replicate 2                                                | 15288.7                                | 13580.5                                  | 6662.1                                 | 676033.5                              | 146054.0                              | 51588.7                             |
| replicate 3                                                | 12947.7                                | 10179.3                                  | 4727.6                                 | 706035.2                              | 127177.5                              | 63503.6                             |
| replicate 4                                                | 47536.4                                | 28062.1                                  | 12144.3                                | 645818.9                              | 124739.8                              | 25242.9                             |
| replicate 5                                                | 53028.5                                | 37071.3                                  | 14157.1                                | 650839.2                              | 98175.6                               | 19508.6                             |
| replicate 6                                                | 48806.7                                | 34743.2                                  | 15899.4                                | 567286.7                              | 139769.3                              | 75859.9                             |
| replicate 7                                                | 34677.9                                | 30917.7                                  | 14813.1                                | 622379.2                              | 128912.2                              | 40641.1                             |
| replicate 8                                                | 8759.0                                 | 7422.1                                   | 1797.9                                 | 776691.9                              | 104462.5                              | 42872.9                             |
| replicate 9                                                | 9112.3                                 | 6373.0                                   | 2459.7                                 | 756205.3                              | 119968.7                              | 44834.5                             |
| replicate 10                                               | 39373.0                                | 30862.9                                  | 19982.8                                | 662016.6                              | 116018.5                              | 15027.5                             |
| replicate 11                                               | 26362.0                                | 21032.9                                  | 11451.9                                | 697885.4                              | 132037.0                              | 26872.3                             |
| replicate 12                                               | 75504.8                                | 66739.2                                  | 44795.1                                | 512695.0                              | 59001.3                               | 24845.8                             |

**Table S6. Concordance of MTB detected by NTS and other diagnosis methods**

| Patient ID                                                                                                                         | Count | GeneXpert       | T-SPOT          | Acid-fast stain |
|------------------------------------------------------------------------------------------------------------------------------------|-------|-----------------|-----------------|-----------------|
| Pt-1202, Pt-286, Pt-1203, Pt-1195,                                                                                                 | 4     | Pos             | Pos             | Pos             |
| Pt-1200, Pt-162, Pt-1196                                                                                                           | 3     | Pos             | Pos             | Neg             |
| Pt-1185                                                                                                                            | 1     | Pos             | Pos             | NA              |
| Pt-1127                                                                                                                            | 1     | Pos             | Neg             | NA              |
| Pt-1199, Pt-1122                                                                                                                   | 2     | Pos             | NA              | Pos             |
| Pt-1206, Pt-1205, Pt-1204, Pt-1201, Pt-110, Pt-538, Pt-639, Pt-1191, Pt-1192, Pt-1190, Pt-1189, Pt-1123, Pt-1124, Pt-1125, Pt-1186 | 15    | Pos             | NA              | Neg             |
| Pt-1198                                                                                                                            | 1     | Pos             | NA              | NA              |
| Pt-1194                                                                                                                            | 1     | NA              | Pos             | Pos             |
| Pt-1197, Pt-690, Pt-1193, Pt-1188                                                                                                  | 4     | NA              | NA              | Neg             |
| Pt-1187                                                                                                                            | 1     | NA              | NA              | NA              |
| Pt-1126                                                                                                                            | 1     | NA              | Neg             | Neg             |
| Concordance with NTS                                                                                                               |       | 100%<br>(27/27) | 81.8%<br>(9/11) | 26.7% (8/30)    |

Abbreviation: NTS, nanopore targeted sequencing; NA, not available. Pos, Positive; Neg, Negative.

**Table S7. Pathogen detected in samples with no clone growth after 72 hours**

| <b>Pathogen detected in samples with no clone growth after 72 hours from department of neurology</b>   |                   |                                   |                                                            |
|--------------------------------------------------------------------------------------------------------|-------------------|-----------------------------------|------------------------------------------------------------|
| <b>Patient No.</b>                                                                                     | <b>Sample No.</b> | <b>Diagnosis</b>                  | <b>NTS result</b>                                          |
| Pt-108                                                                                                 | Sp. 163           | Central nervous system infection  | <i>Staphylococcus lugdunensis, Acinetobacter junii</i>     |
| Pt-1178                                                                                                | Sp. 1233          | Encephalitis                      | <i>Enterococcus faecium, Nocardioides terrigena</i>        |
| Pt-18                                                                                                  | Sp. 34            | Central nervous system infection  | <i>Streptococcus gordonii, Prevotella melaninogenica</i>   |
| Pt-182                                                                                                 | Sp. 237           | Encephalitis                      | <i>Anaerococcus lactolyticus, Aspergillus fumigatus</i>    |
| Pt-20                                                                                                  | Sp. 39            | Pulmonary infection               | <i>Candida albicans</i>                                    |
| Pt-234                                                                                                 | Sp. 289           | Meningitis                        | <i>Rhodospiridiobolus fluvialis</i>                        |
| Pt-405                                                                                                 | Sp. 460           | Obstructive hydrocephalus         | <i>Aspergillus pseudoglaucus</i>                           |
| Pt-43                                                                                                  | Sp. 90            | Communicating hydrocephalus       | <i>Cladosporium colombiae</i>                              |
| Pt-540                                                                                                 | Sp. 595           | Upper respiratory tract infection | <i>Acinetobacter junii</i>                                 |
| Pt-717                                                                                                 | Sp. 772           | Suppurative meningitis            | <i>Corynebacterium striatum, Escherichia coli</i>          |
| Pt-818                                                                                                 | Sp. 873           | Central nervous system infection  | <i>Erwinia aphidicola</i>                                  |
| Pt-984                                                                                                 | Sp-1039           | Epilepsy                          | <i>Candida membranifaciens</i>                             |
| <b>Pathogen detected in samples with no clone growth after 72 hours from department of respiration</b> |                   |                                   |                                                            |
| <b>Patient No.</b>                                                                                     | <b>Sample No.</b> | <b>Diagnosis</b>                  | <b>NTS result</b>                                          |
| Pt-1125                                                                                                | Sp. 1180          | Pulmonary infection               | <i>Mycobacterium tuberculosis</i>                          |
| Pt-1127                                                                                                | Sp. 1182          | Tuberculosis                      | <i>Mycobacterium tuberculosis</i>                          |
| Pt-1179                                                                                                | Sp. 1234          | Pulmonary infection               | <i>Nocardia pyrenoides</i>                                 |
| Pt-1189                                                                                                | Sp. 1244          | Pulmonary infection               | <i>Mycobacterium tuberculosis</i>                          |
| Pt-1198                                                                                                | Sp. 1253          | Pulmonary infection               | <i>Mycobacterium tuberculosis, Cryptococcus neoformans</i> |
| Pt-1200                                                                                                | Sp. 1255          | Aortic arteriosclerosis           | <i>Mycobacterium tuberculosis, Escherichia coli</i>        |

|         |          |                                      |                                                                                               |
|---------|----------|--------------------------------------|-----------------------------------------------------------------------------------------------|
| Pt-1202 | Sp. 1257 | Pulmonary infection                  | <i>Mycobacterium tuberculosis</i>                                                             |
| Pt-1207 | Sp. 1262 | Community Acquired Pneumonia, Severe | <i>Legionella pneumophila, Candida albicans</i>                                               |
| Pt-1224 | Sp. 1279 | Emphysema                            | <i>Aspergillus flavus</i>                                                                     |
| Pt-286  | Sp. 341  | Pulmonary infection                  | <i>Mycobacterium tuberculosis, Pseudomonas alcaliphila</i>                                    |
| Pt-293  | Sp. 348  | Pulmonary infection                  | <i>Escherichia coli, Acinetobacter baumannii, Candida tropicalis, Cryptococcus neoformans</i> |
| Pt-538  | Sp. 593  | Bilateral pulmonary infection        | <i>Mycobacterium tuberculosis</i>                                                             |
| Pt-553  | Sp. 608  | Pulmonary infection                  | <i>Haemophilus influenzae</i>                                                                 |
| Pt-584  | Sp. 639  | Pulmonary infection                  | <i>Tropheryma whipplei</i>                                                                    |
| Pt-670  | Sp. 725  | Community acquired pneumonia, severe | <i>Escherichia coli</i>                                                                       |
| Pt-677  | Sp. 732  | Community acquired pneumonia         | <i>Mycoplasma pneumoniae</i>                                                                  |
| Pt-724  | Sp. 779  | Pulmonary infection                  | <i>Staphylococcus aureus, Escherichia coli, Pseudomonas aeruginosa, Candida albicans</i>      |
| Pt-928  | Sp. 983  | Severe pneumonia                     | <i>Haemophilus influenzae</i>                                                                 |

---

**Table S8. Evaluation the impact of NTS results on antibiotic modification**

|                                     | <b>Culture Result</b>                           | <b>NTS Result</b>                                                                                                                | <b>clinical Diagnosis</b>                                                                                      | <b>Initial Antibiotics</b>                                                                            | <b>Antibiotic Change</b>                                                                                               | <b>Proportion</b> |
|-------------------------------------|-------------------------------------------------|----------------------------------------------------------------------------------------------------------------------------------|----------------------------------------------------------------------------------------------------------------|-------------------------------------------------------------------------------------------------------|------------------------------------------------------------------------------------------------------------------------|-------------------|
| <b>Change; targeted antibiotics</b> | <i>Staphylococcus aureus</i>                    | <i>Staphylococcus aureus</i> ;<br><i>Candida albicans</i>                                                                        | Pulmonary infection                                                                                            | Cefazoxime Sodium,<br>Azithromycin                                                                    | Meropenem,<br>Teicoplanin                                                                                              | 7/33<br>(21.2%)   |
|                                     | <i>Acinetobacter baumannii</i>                  | <i>Acinetobacter baumannii</i> ;<br><i>Pseudomonas aeruginosa</i> ;<br><i>Streptococcus mitis</i> ;<br><i>Candida tropicalis</i> | Severe pneumonia                                                                                               | Cefazoxime Sodium,<br>Etilmicin, Meropenem                                                            | Ceftazidime,<br>Meropenem                                                                                              |                   |
|                                     | Oral normal bacteria                            | Low abundance of<br><i>Aspergillus fumigatus</i>                                                                                 | Pulmonary infection                                                                                            | Meropenem,<br>Linezolid,<br>Levofloxacin,<br>Ceftazidime,<br>Imipenem,<br>Gentamicin,<br>Foliconazole | Moxifloxacin,<br>Meroxicillin<br>Sulbactam Sodium,<br>Cefazoxime Sodium,<br>Cefotiam<br>Voriconazole<br>Amphotericin B |                   |
|                                     | Oral normal bacteria;<br>No fungus was detected | <i>Aspergillus fumigatus</i> ;<br><i>Enterococcus faecium</i> ;<br><i>Corynebacterium striatum</i> ;                             | Acute exacerbation of chronic obstructive pulmonary disease complicated with lower respiratory tract infection | Methylprednisolone sodium succinate<br>voriconazole                                                   | Voriconazole,<br>Amphotericin B                                                                                        |                   |
|                                     | Oral normal bacteria                            | <i>Acinetobacter baumannii</i> ;<br><i>Candida parasilosis</i> ;<br><i>Streptococcus mitis</i>                                   | Community Acquired Pneumonia,<br>Severe                                                                        | Ceftazidime,<br>levofloxacin,<br>cefoperazone and sulbactam sodium                                    | Linezolid,<br>Vancomycin, Voriconazole                                                                                 |                   |
|                                     | Oral normal bacteria                            | <i>Haemophilus influenzae</i> ;<br>High abundance of <i>Aspergillus</i>                                                          | Invasive pulmonary aspergillosis                                                                               | Levofloxacin,<br>Cefoperazone-sulbactam,<br>Ceftazidime                                               | Moxifloxacin,<br>Ceftazidime,<br>Fluconazole,                                                                          |                   |

|                                                       |                                                                                                                    |                                                                                         |                     |                                        |                                         |                  |
|-------------------------------------------------------|--------------------------------------------------------------------------------------------------------------------|-----------------------------------------------------------------------------------------|---------------------|----------------------------------------|-----------------------------------------|------------------|
|                                                       |                                                                                                                    | <i>fumigatus</i> ;<br><i>Streptococcus</i><br><i>mitis</i>                              |                     |                                        | Azithromycin, Voriconazole              |                  |
|                                                       | <i>Acinetobacter</i><br><i>baumannii</i>                                                                           | <i>Acinetobacter</i><br><i>baumannii</i> ;<br><i>Streptococcus</i><br><i>pneumoniae</i> | Severe<br>pneumonia | Ceftazidime,<br>Meropenem,<br>Amipenem | Cefoperazone-<br>sulbactam, Minocycline |                  |
| <b>Unchange;<br/>Covered</b>                          | The selection of antimicrobial agents did not change and the antimicrobial spectrum covered the detected bacteria. |                                                                                         |                     |                                        |                                         | 12/33<br>(36.4%) |
| <b>Changed;<br/>covered</b>                           | The selection of antimicrobial agents has varied and the antimicrobial spectrum covering the detected bacteria     |                                                                                         |                     |                                        |                                         | 10/33<br>(30.3%) |
| <b>No antibiotic<br/>pre-<br/>administratio<br/>n</b> | <i>Mycobacterium tuberculosis</i> was detected and transferred to specialized hospital for treatment.              |                                                                                         |                     |                                        |                                         | 2/33<br>(6%)     |
| <b>Others</b>                                         | The patient asked to be discharged from hospital without follow-up medication.                                     |                                                                                         |                     |                                        |                                         | 2/33<br>(6%)     |

## Reference

1. Calus ST, Ijaz UZ, Pinto AJ. Nanoampli-seq: A workflow for amplicon sequencing for mixed microbial communities on the nanopore sequencing platform. *GigaScience* 2018;7.
2. Fujita SI, Senda Y, Nakaguchi S, Hashimoto T. Multiplex pcr using internal transcribed spacer 1 and 2 regions for rapid detection and identification of yeast strains. *J Clin Microbiol* 2001;39:3617-22.
3. Kim BJ, Lee SH, Lyu MA, Kim SJ, Bai GH, Chae GT, et al. Identification of mycobacterial species by comparative sequence analysis of the rna polymerase gene (rpoB). *J Clin Microbiol* 1999;37:1714-20.
4. Colman RE, Anderson J, Lemmer D, Lehmkuhl E, Georghiou SB, Heaton H, et al. Rapid drug susceptibility testing of drug-resistant mycobacterium tuberculosis isolates directly from clinical samples by use of amplicon sequencing: A proof-of-concept study. *J Clin Microbiol* 2016;54:2058-67.
5. Miao Q, Ma Y, Wang Q, Pan J, Zhang Y, Jin W, et al. Microbiological diagnostic performance of metagenomic next-generation sequencing when applied to clinical practice. *Clin Infect Dis* 2018;67:S231-S40.
